# Supplementary material for: Casticin attenuates liver fibrosis and hepatic stellate cell activation by blocking TGF-β/Smad signaling pathway
Source: PubMed Central journal article supplement (PMC5593560; doi:10.18632/oncotarget.17453), 2017-04-27
Supplement: oncotarget-08-56267-s001.pdf [file oncotarget-08-56267-s001.pdf]

# Casticin attenuates liver fibrosis and hepatic stellate cell activation by blocking TGF-β/Smad signaling pathway

## Supplementary Materials

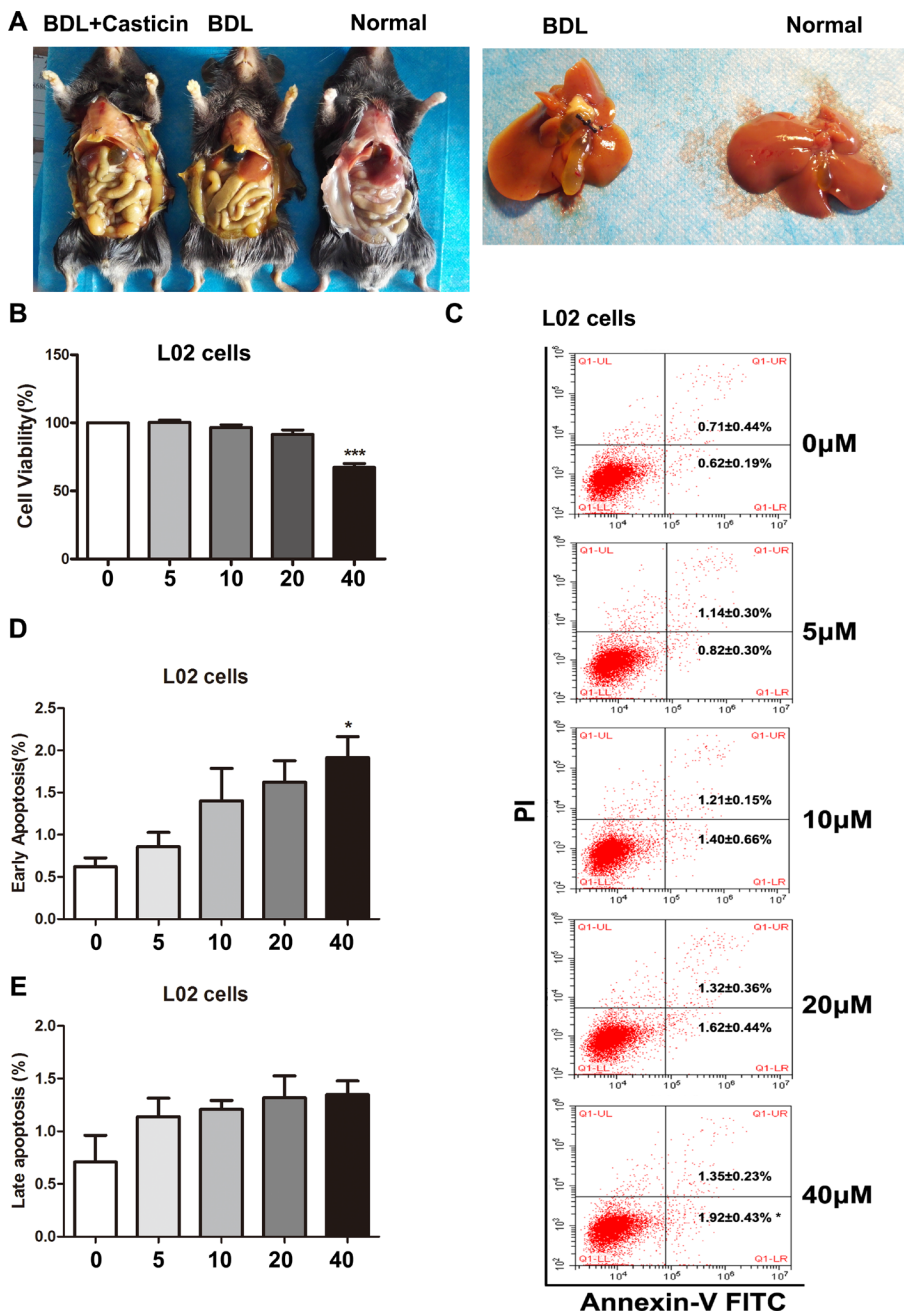

**Supplementary Figure 1:** (A) Representative appearance of livers 2 weeks after sham operation and BDL. (B–E) Effect of casticin on cell proliferation and apoptosis of L02 cells.

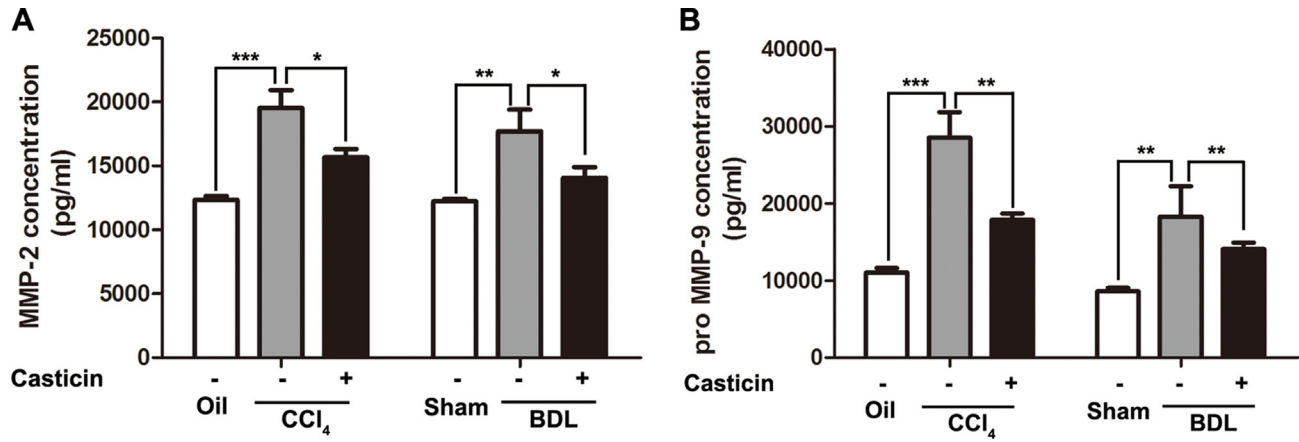

Supplementary Figure 2: (A–B) Serum MMP-2 and pro MMP-9 determination were detected by Elisa.
